# Supplementary material for: A novel palladium-catalyzed cyclization of indole phytoalexin brassinin and its 1-substituted derivatives
Source: Royal Society of Chemistry journal article supplement (doi:10.1039/c3ra46843g), 2013-12-18

## Supplementary Data

### **A novel palladium-catalyzed cyclization of indole phytoalexin brassinin and its 1-substituted derivatives**

Mariana Budovská<sup>a\*</sup>

*<sup>a</sup>Department of Organic Chemistry, Institute of Chemical Sciences, Faculty of Science, P. J. Šafárik University, Moyzesova 11, 040 01, Košice, Slovak Republic*

\*Corresponding author. Tel.: +421552341196

*E-mail address: mariana.budovska@upjs.sk*

#### **1. Experimental section**

<sup>1</sup>H NMR (400 MHz) and <sup>13</sup>C NMR (100 MHz) spectra were measured on a Varian Mercury Plus spectrometer.

**N-(1-Methoxyindol-3-yl)methyl-N'-phenylthiourea (16)**  
<sup>1</sup>H NMR spectrum of 16

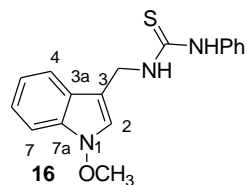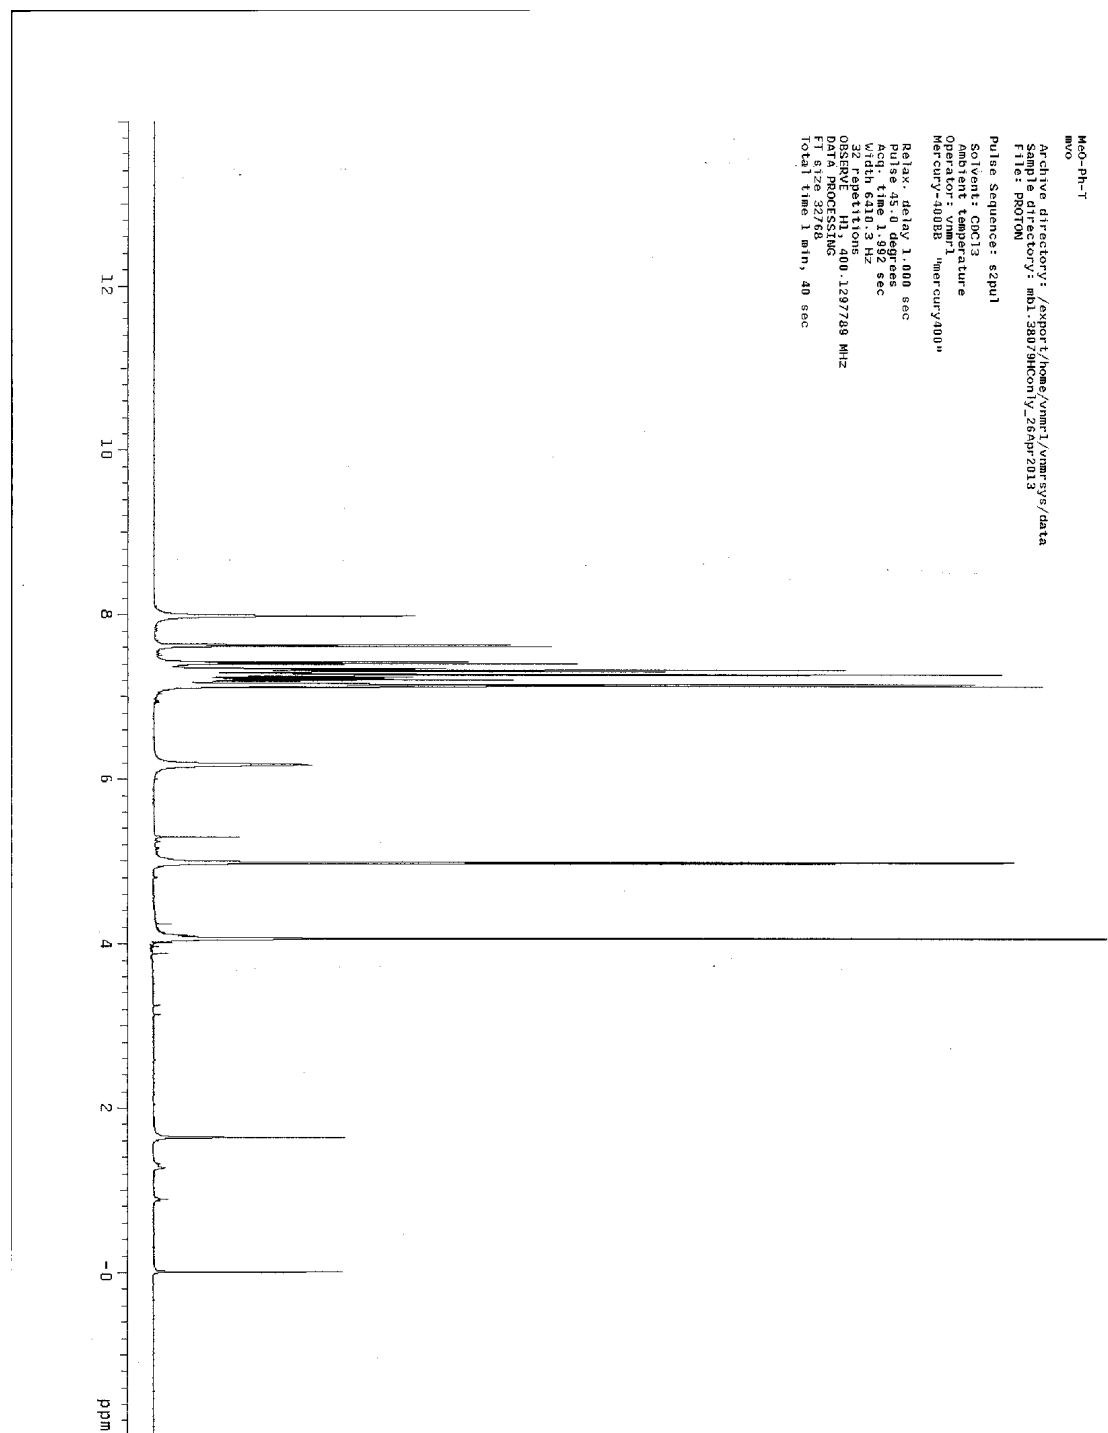

### <sup>13</sup>C NMR spectrum of 16

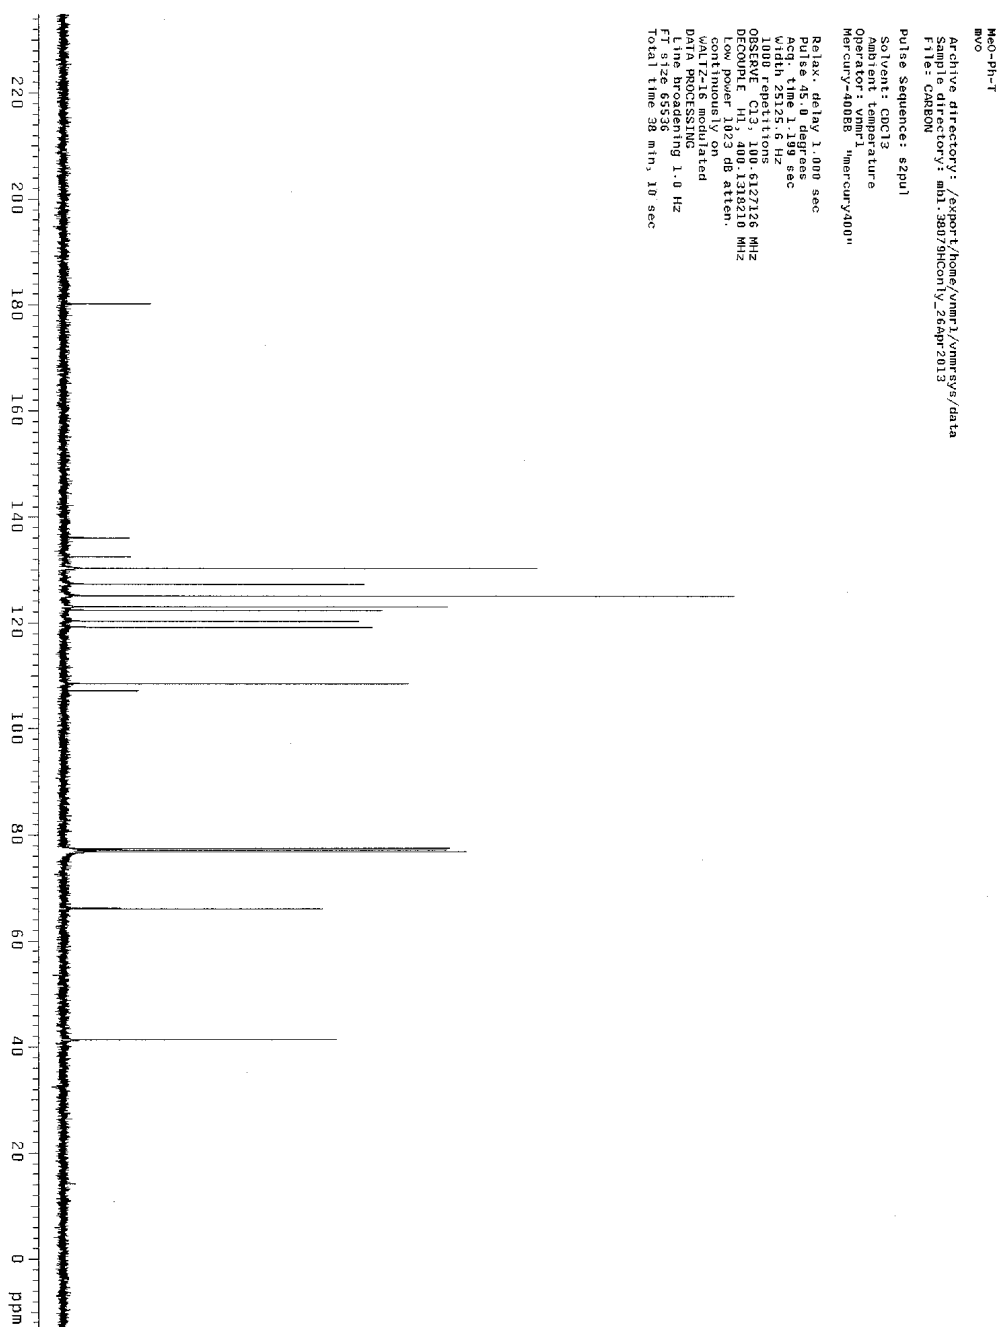

***trans* and *cis*-(±)-1-Methoxyspirobrassinol [(±)-5a and (±)-5b]**

<sup>1</sup>H NMR spectrum of mixture (±)-5a and (±)-5b

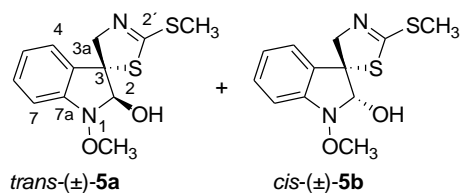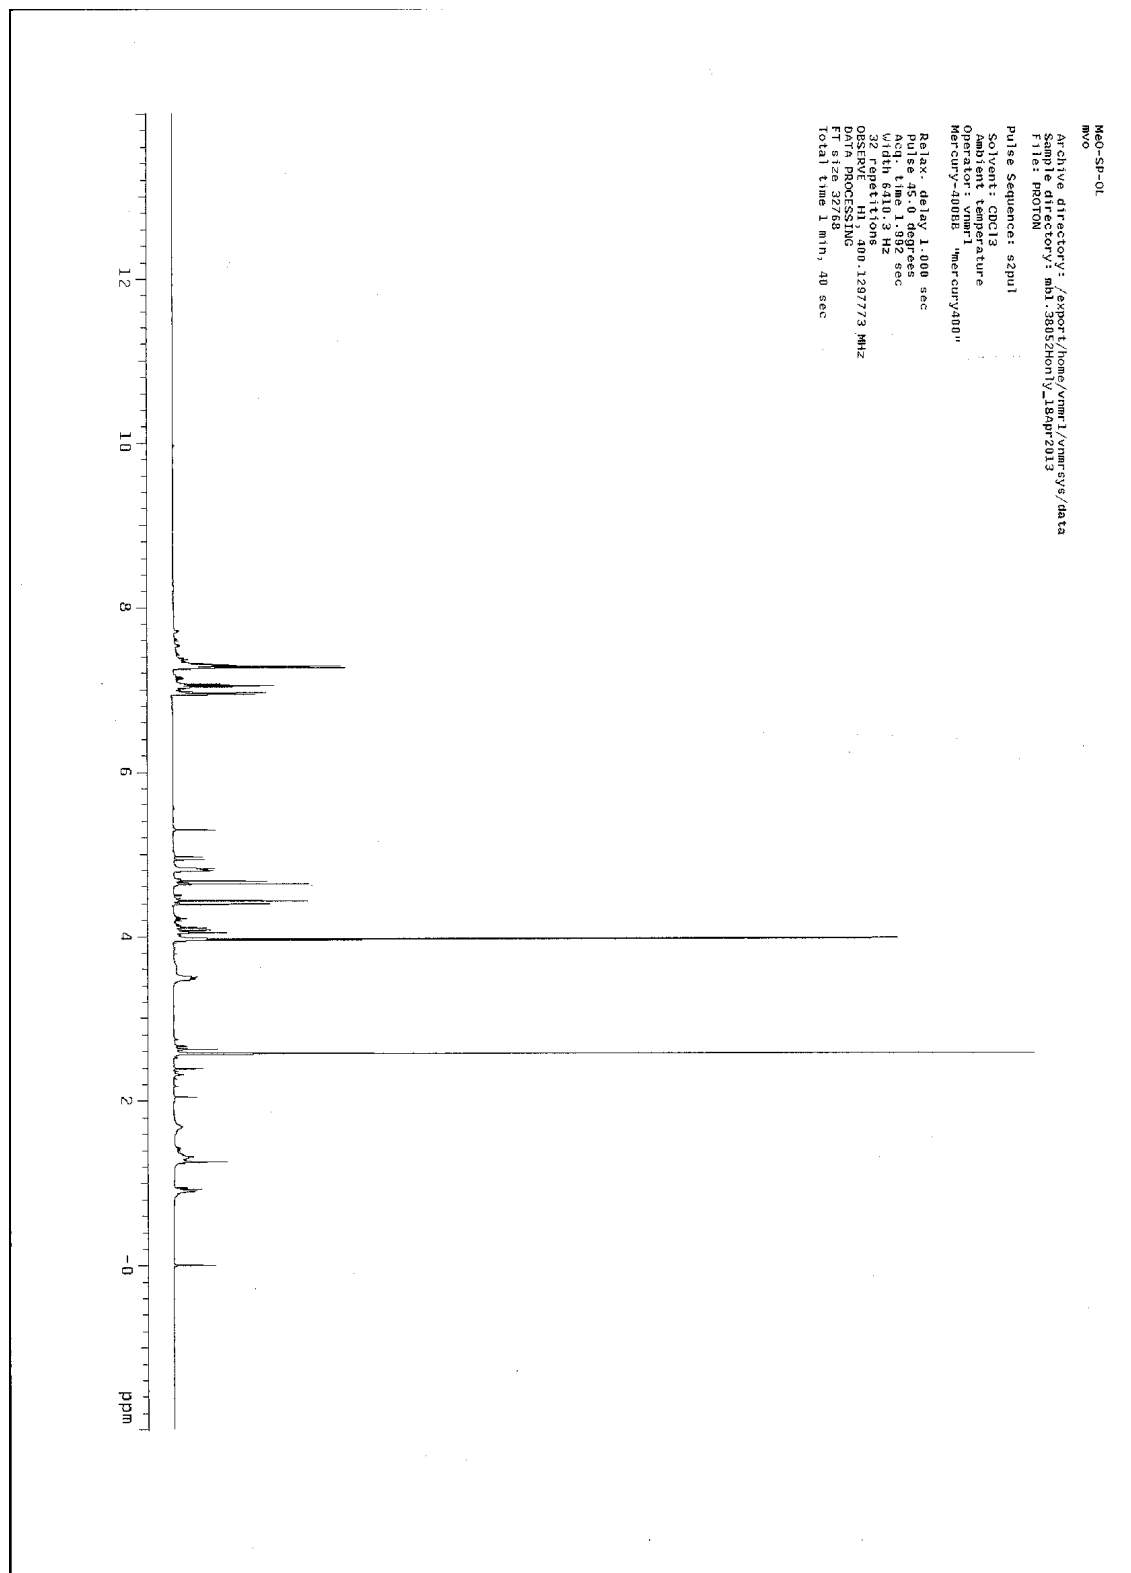

***trans* and *cis*-(±)-1-Methoxyspirobrassinol methyl ether [(±)-6a and (±)-6b]**

<sup>1</sup>H NMR spectrum of mixture (±)-6a and (±)-6b

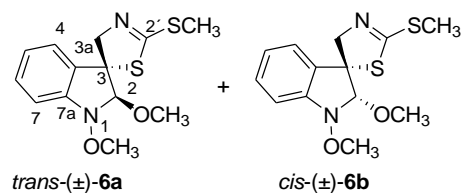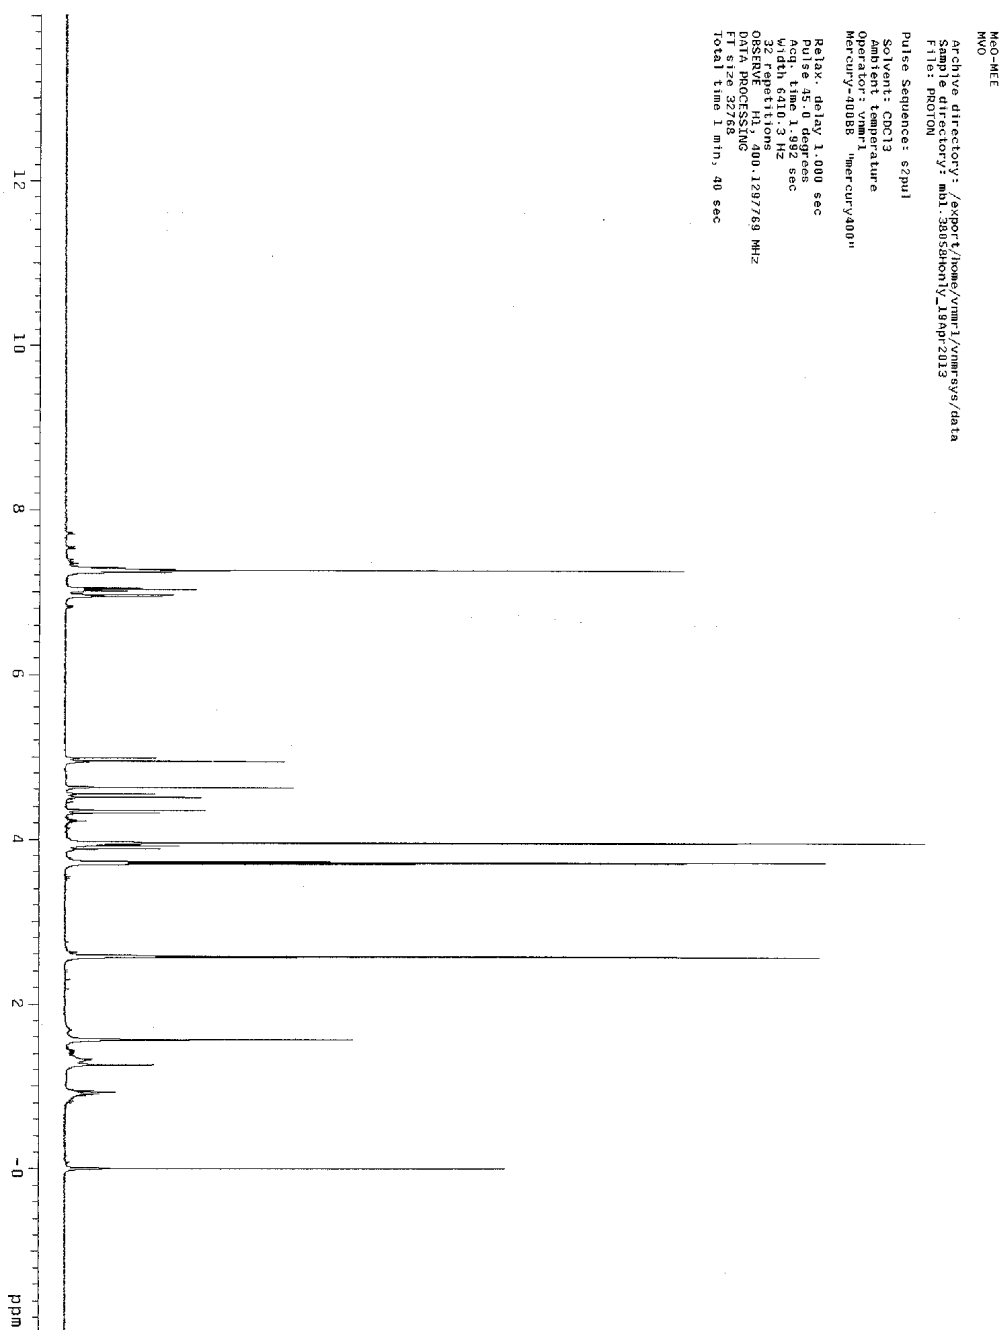

*trans* and *cis*-(±)-1-Methoxy-2-phenylamino-2'-(methylsulfonyl)spiro[indoline-3,5'-  
[4',5']-dihydrothiazol] [(±)-18a and (±)-18b]

<sup>1</sup>H NMR spectrum of mixture (±)-18a and (±)-18b in CDCl<sub>3</sub>

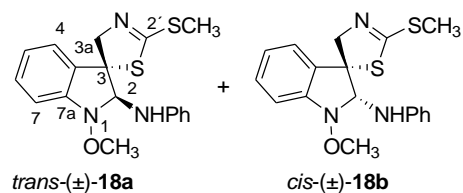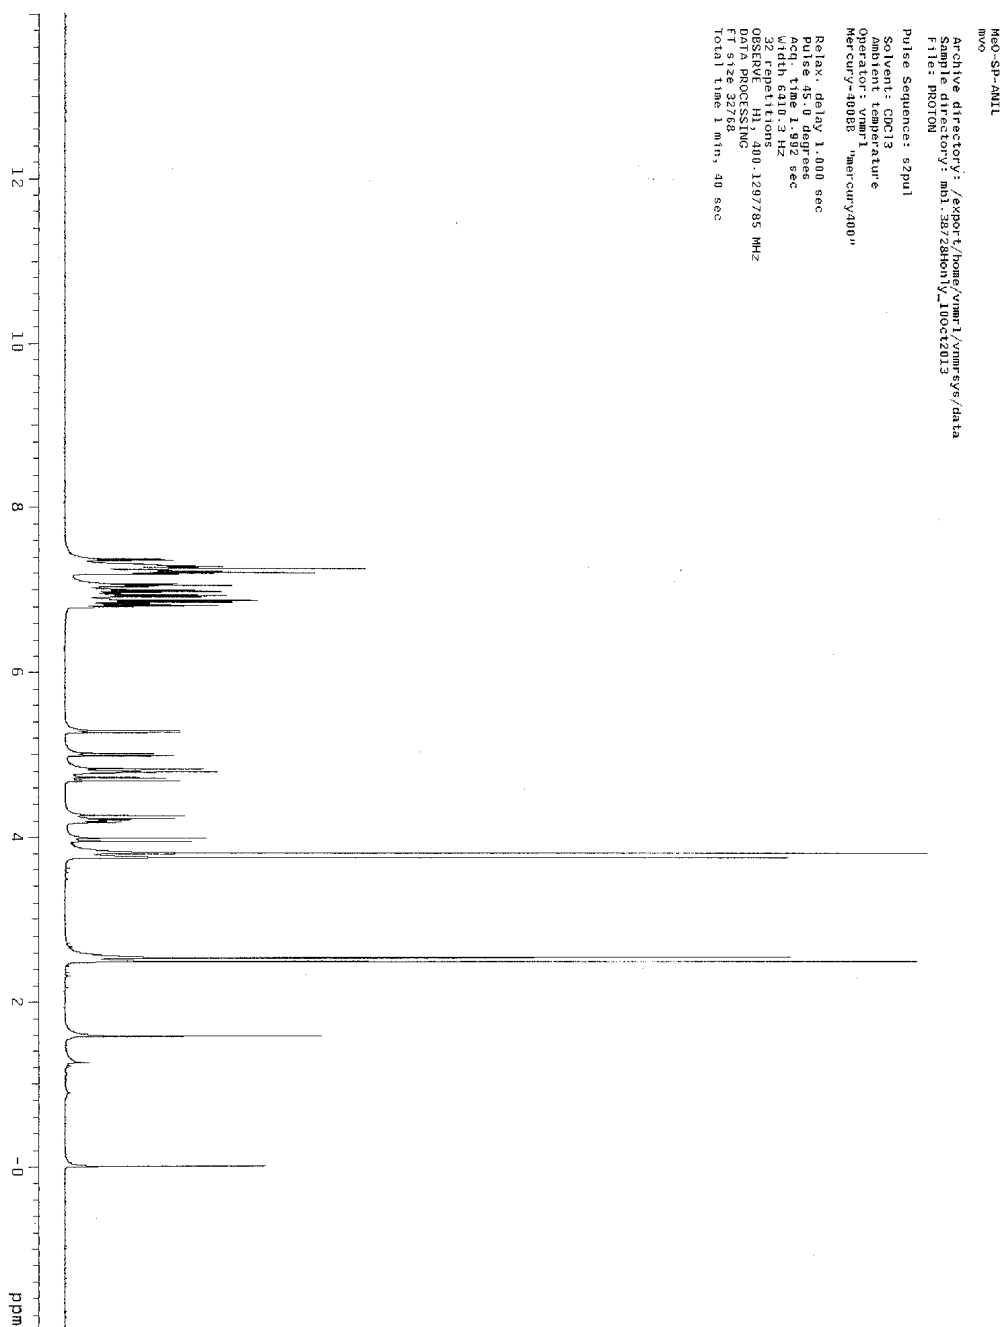

$^1\text{H}$  NMR spectrum of mixture ( $\pm$ )-**18a** and ( $\pm$ )-**18b** in  $(\text{CD}_3)_2\text{CO}$

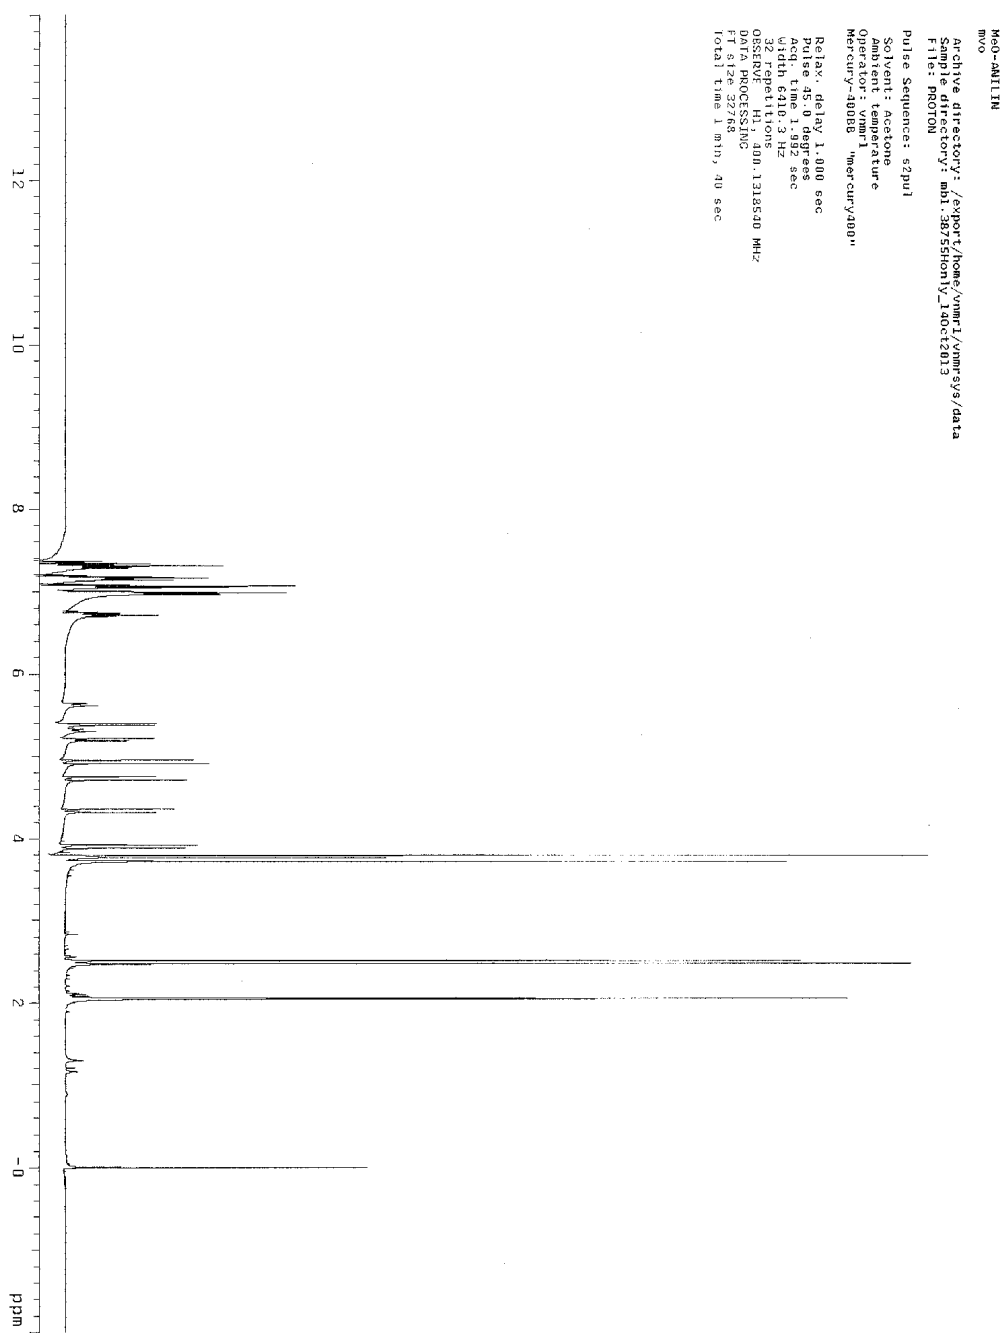





***trans* and *cis*-(±)-1-(*tert*-Butoxycarbonyl)spirobrassinol methyl ether [(±)-20a and (±)-20b]**

<sup>1</sup>H NMR spectrum of (±)-20a

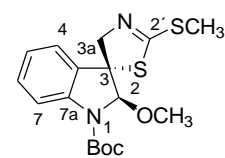

***trans*-(±)-20a**

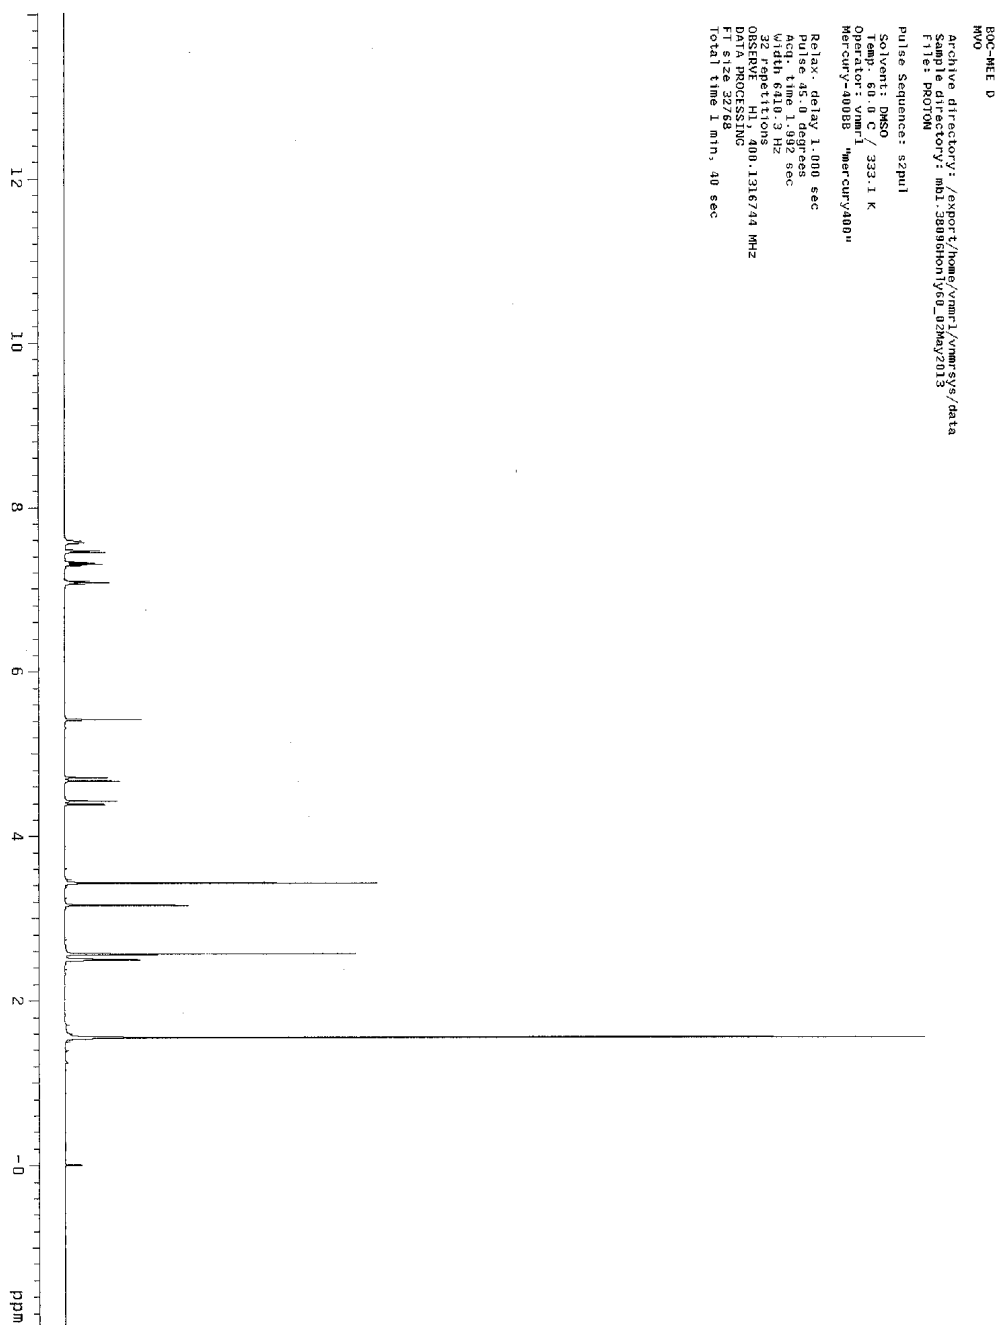

$^{13}\text{C}$  NMR spectrum of ( $\pm$ )-20a

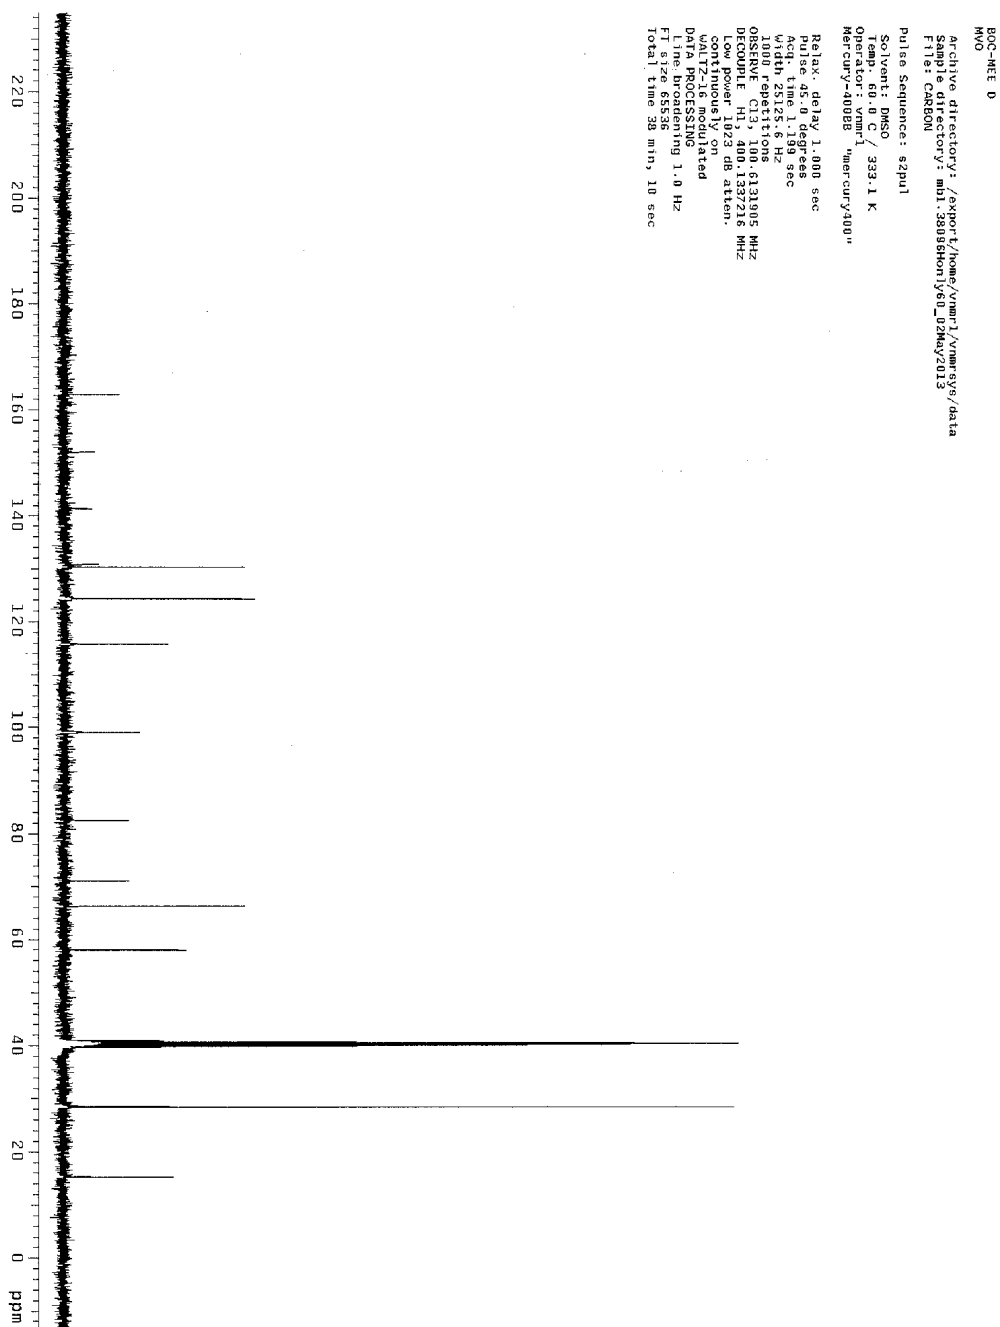



$^{13}\text{C}$  NMR spectrum of ( $\pm$ )-**20b**

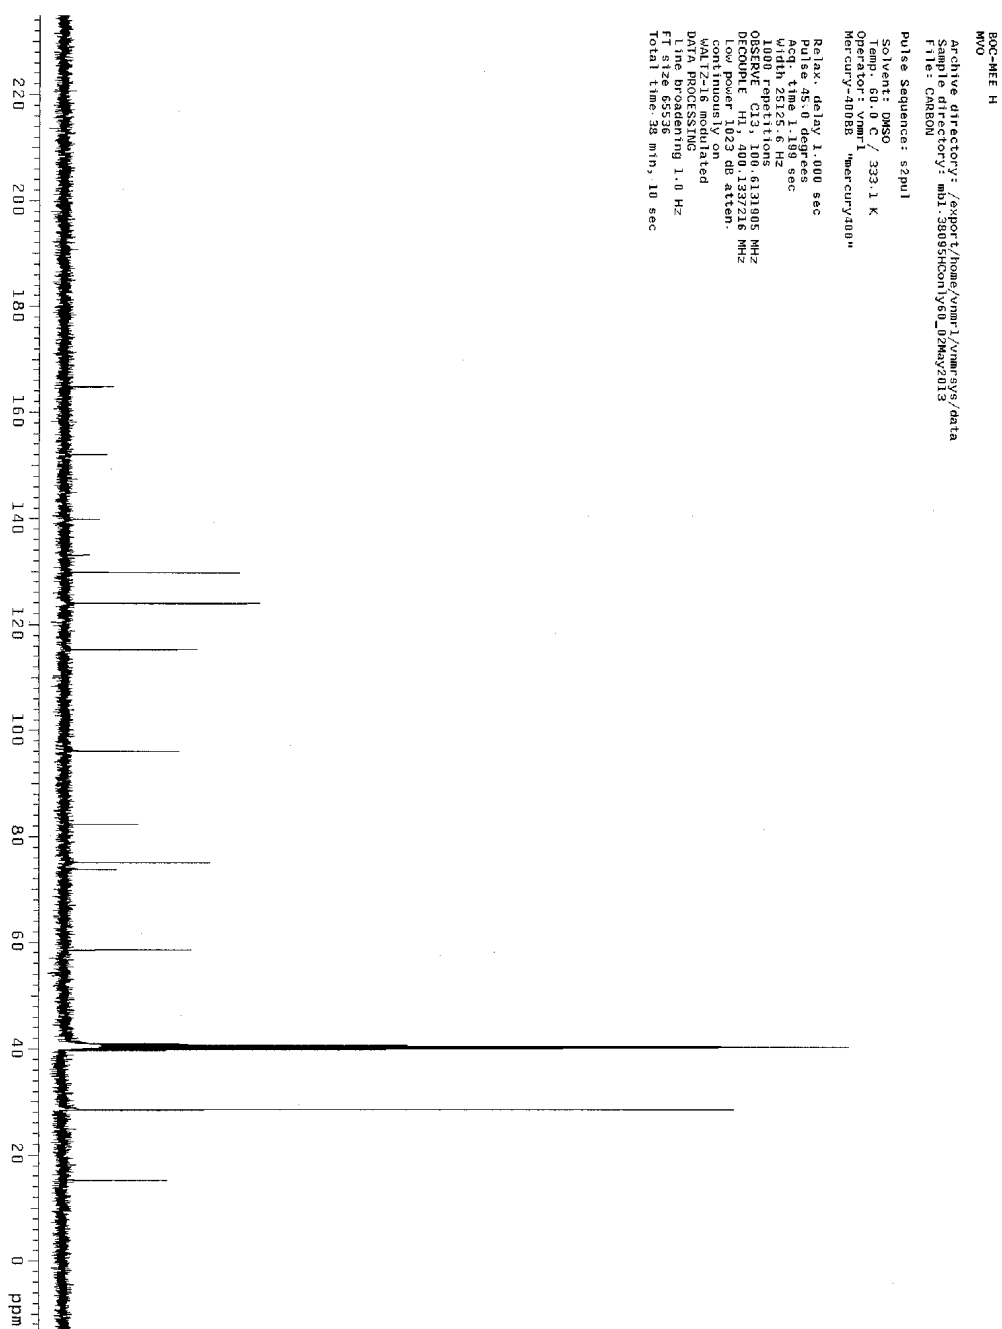



$^{13}\text{C}$  NMR spectrum of mixture ( $\pm$ )-**21a** and ( $\pm$ )-**21b**

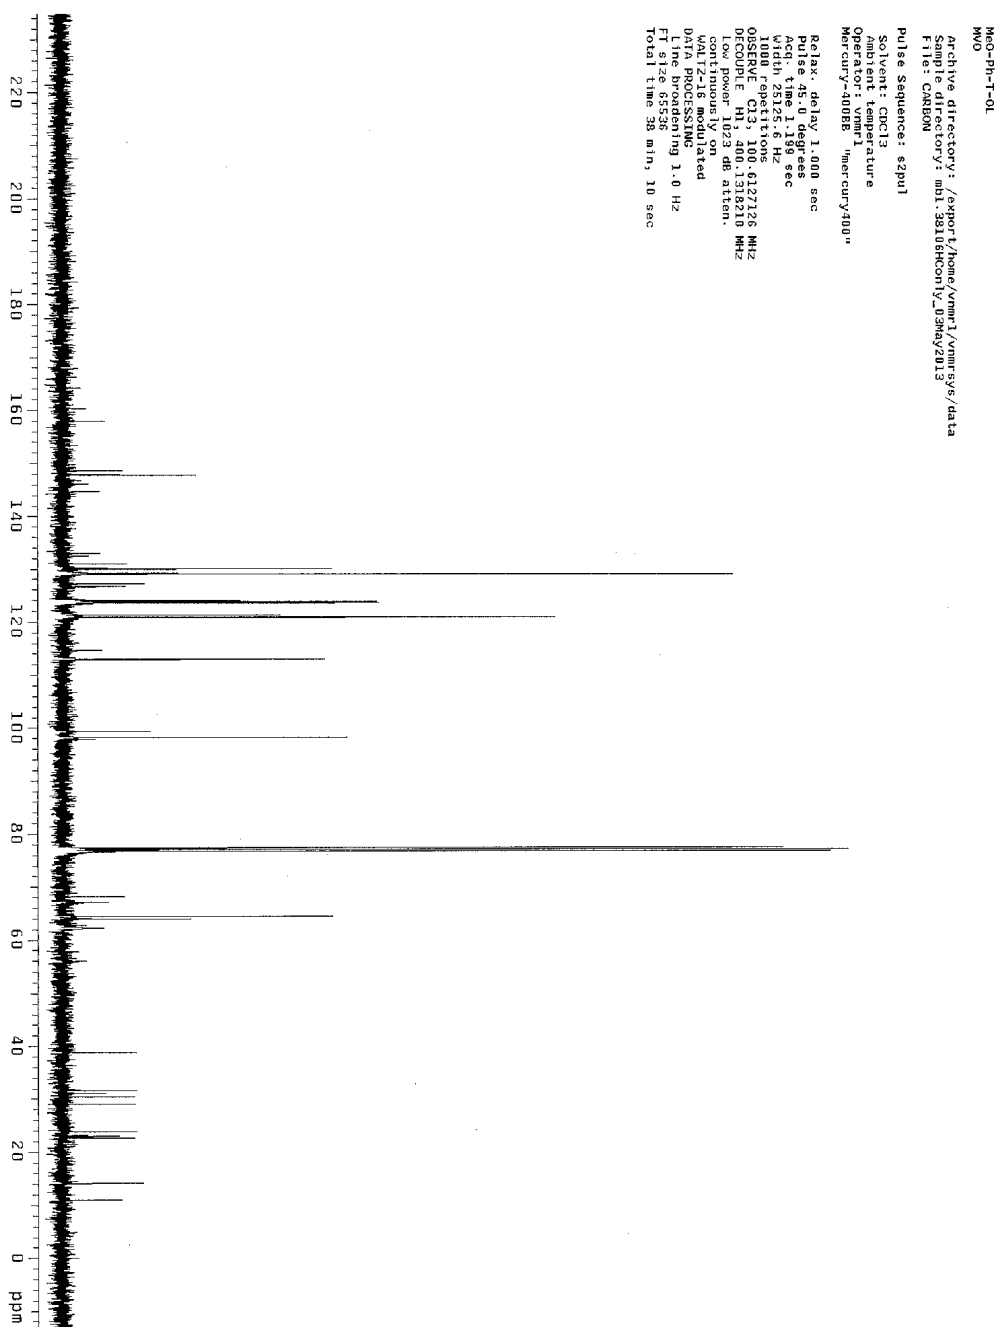

***trans* and *cis*-(±)-1-Methoxy-2-methoxy-2'-(phenylamino)spiro{indoline-3,5'-[4',5']-dihydrothiazol} [(±)-22a and (±)-22b].**

<sup>1</sup>H NMR spectrum of (±)-22a

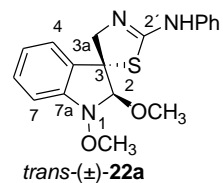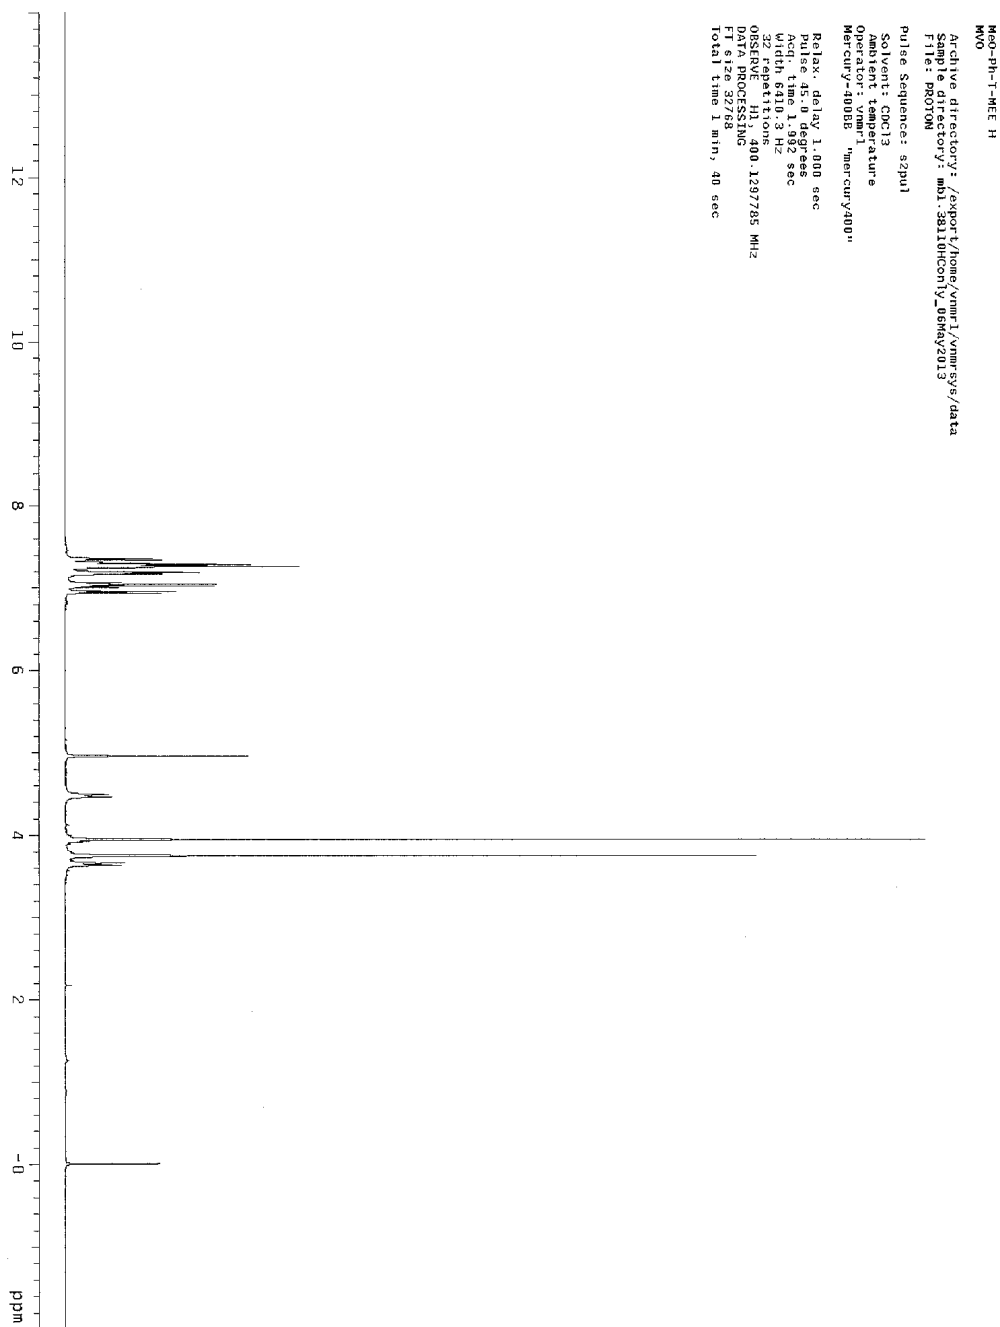

$^{13}\text{C}$  NMR spectrum of (+)-**22a**

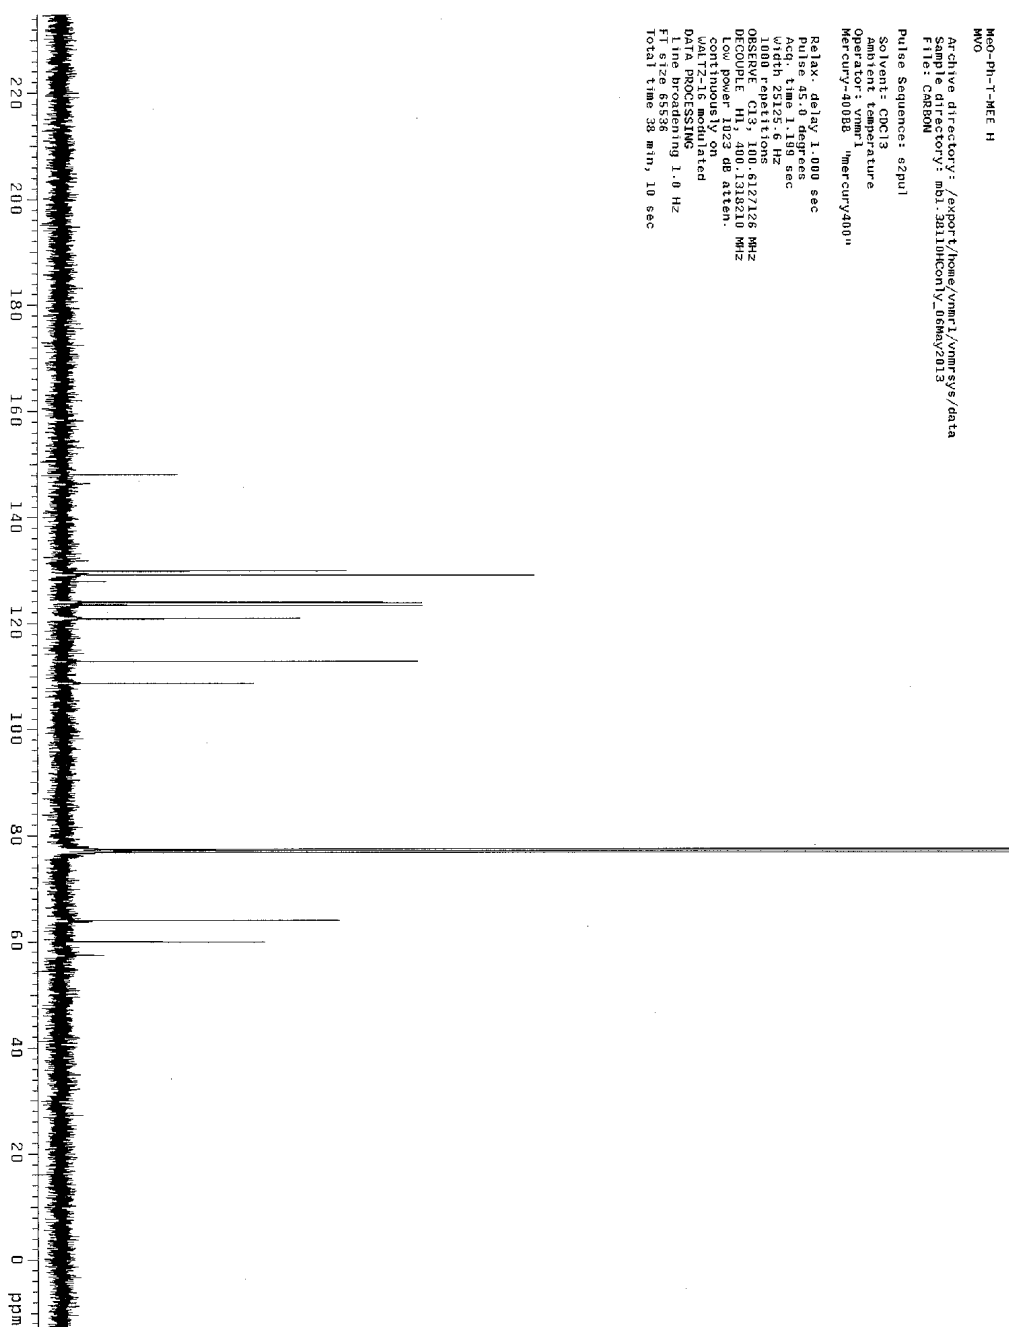



$^1\text{H}$  NMR spectrum of ( $\pm$ )-**22b**

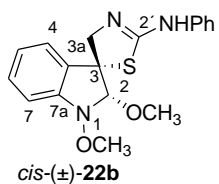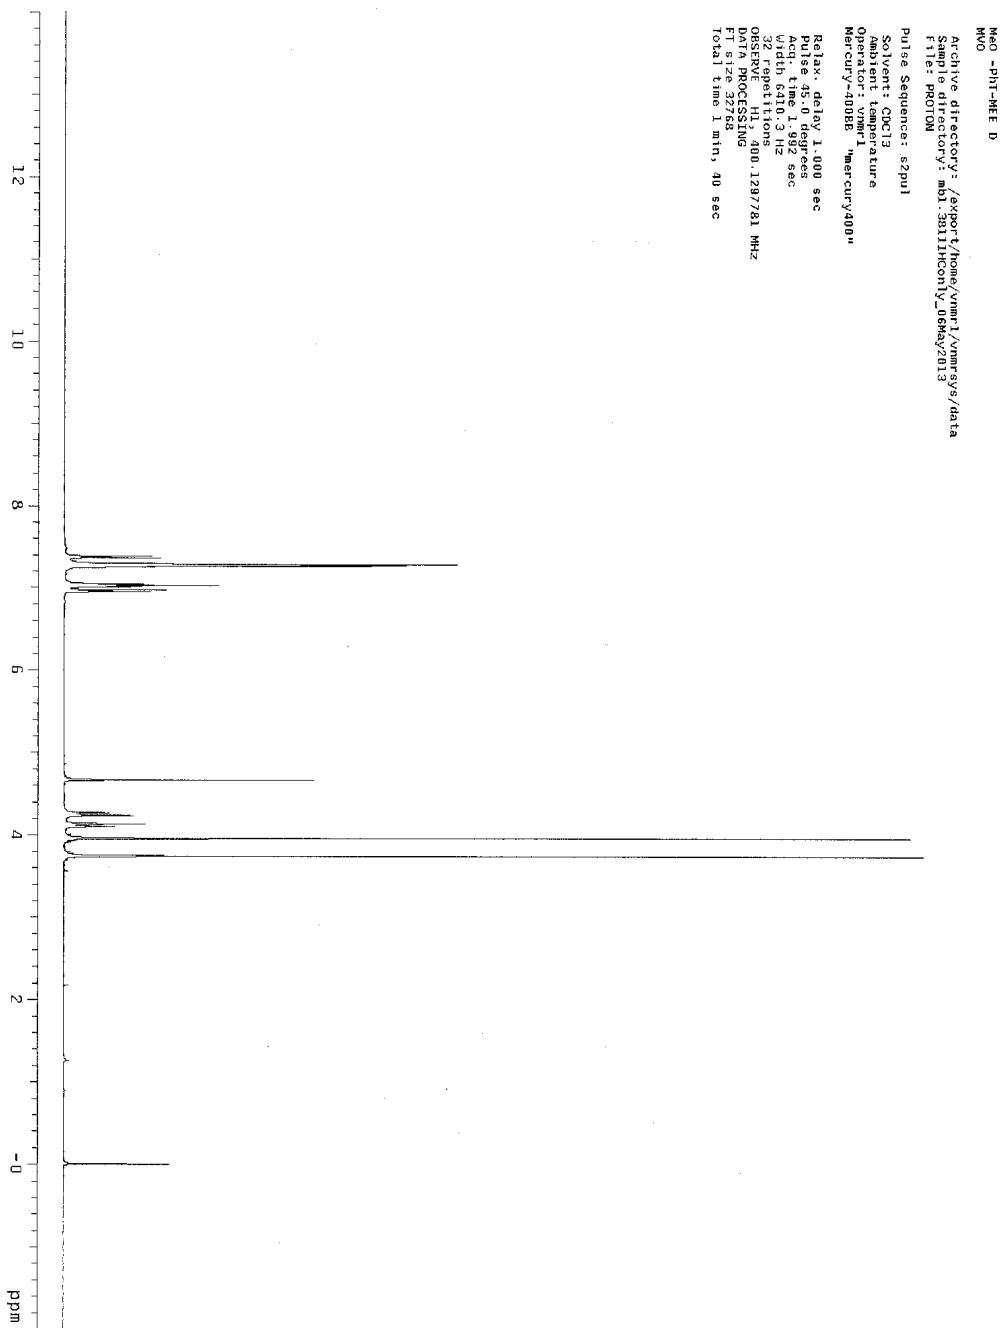

$^{13}\text{C}$  NMR spectrum of ( $\pm$ )-22b

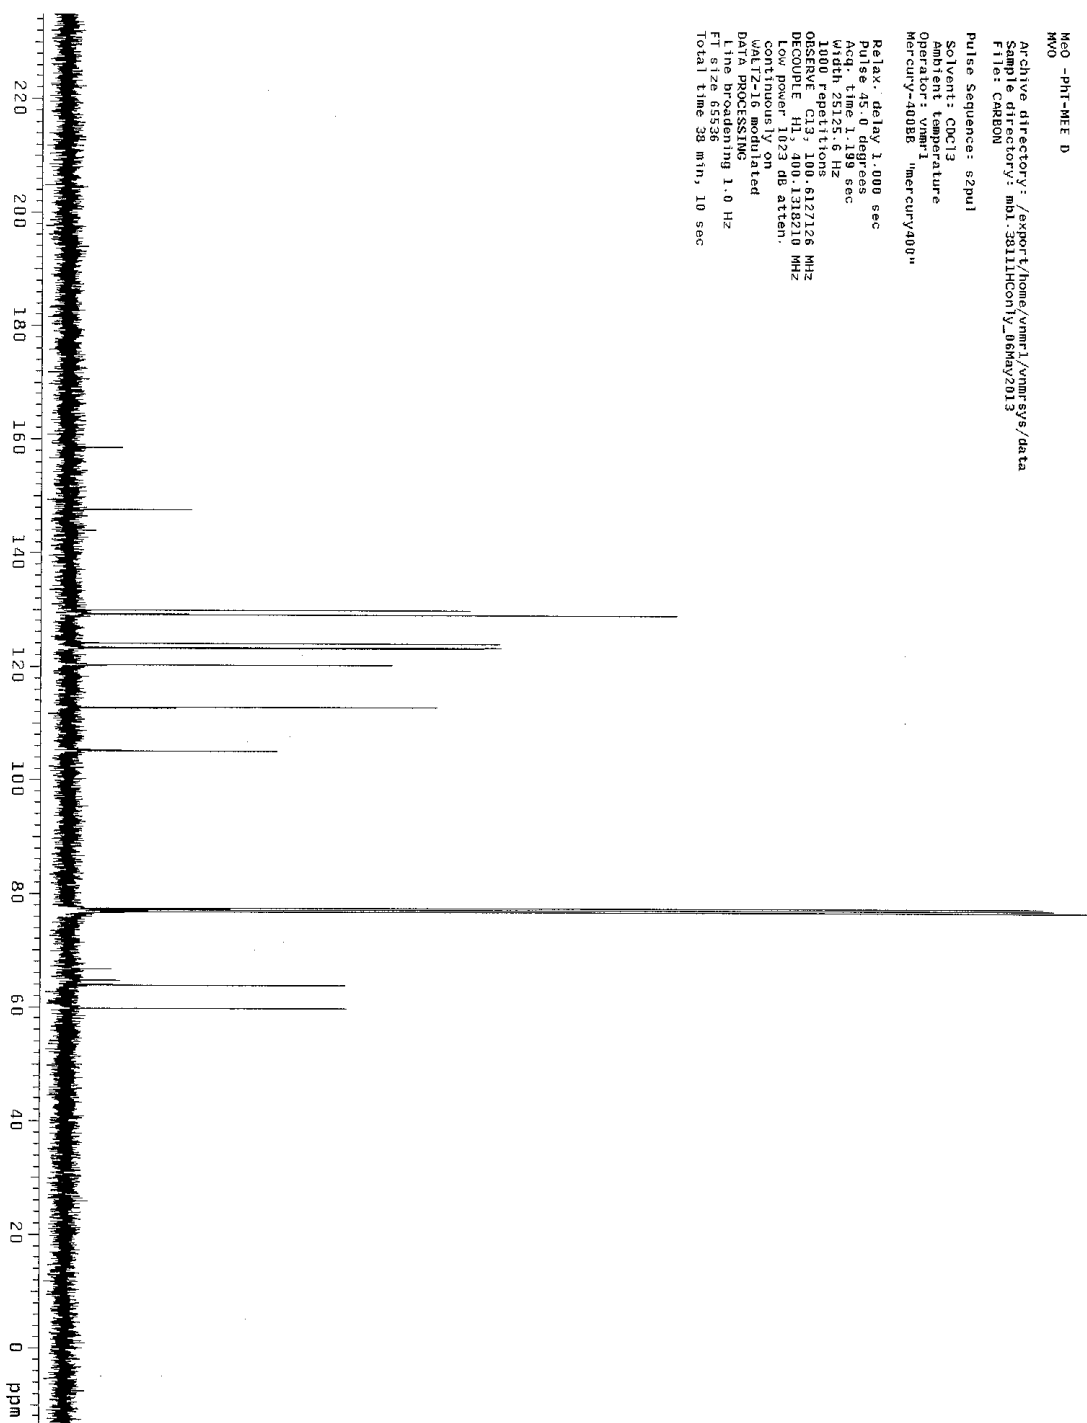



*trans* and *cis*-(±)-1-(*tert*-Butoxycarbonyl)-2-methoxy-2'-(phenylamino)spiro[indoline-3,5'-[4',5']-dihydrothiazol] [(±)-24a and (±)-24b].

<sup>1</sup>H NMR spectrum of mixture (±)-24a and (±)-24b

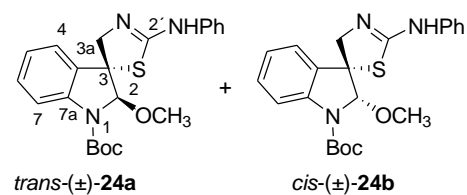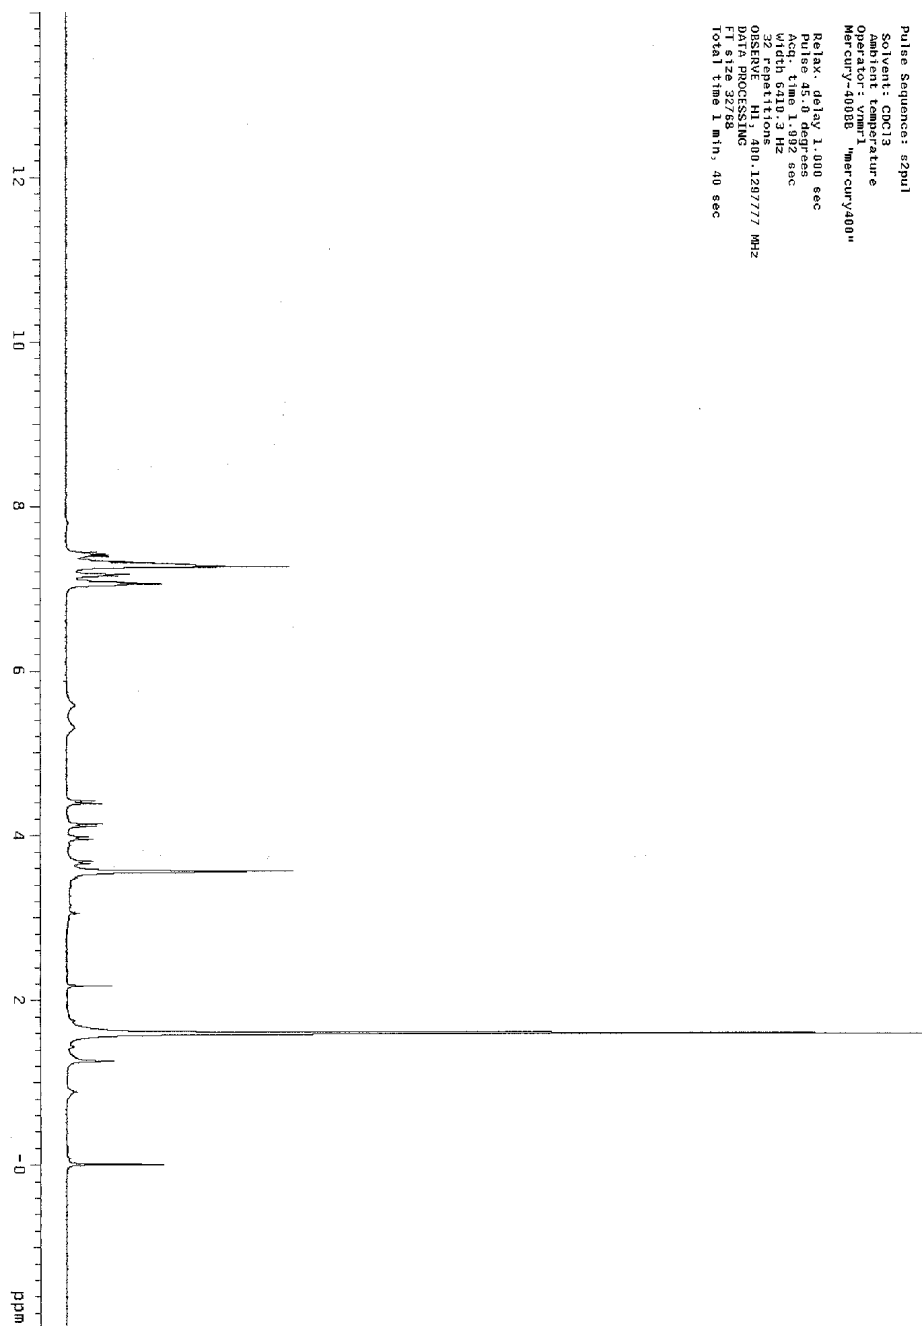

```
ROC-0h-1-MEE
MVO
Archive directory: /export/home/vnmr1/vnmr/sy/s/data
Sample directory: MDL38116h01y_07May2013
File: PROTON
Pulse Sequence: s2pul
Solvent: CDCl3
Ambient temperature
Operator: vnmr1
Mercury:400B   Mercury:400
Relax delay: 1.000 sec
Pulse: 45.0 degrees
Acq. time: 1.092 sec
Width: 6410.3 Hz
32 repetitions
ORIGIN: 1
DATA PROCESSING
FT size 32758
Total time 1 min, 40 sec
```

**(±)-Spirobrassinin [(±)-3]**  
<sup>1</sup>H NMR spectrum of (±)-3

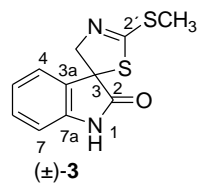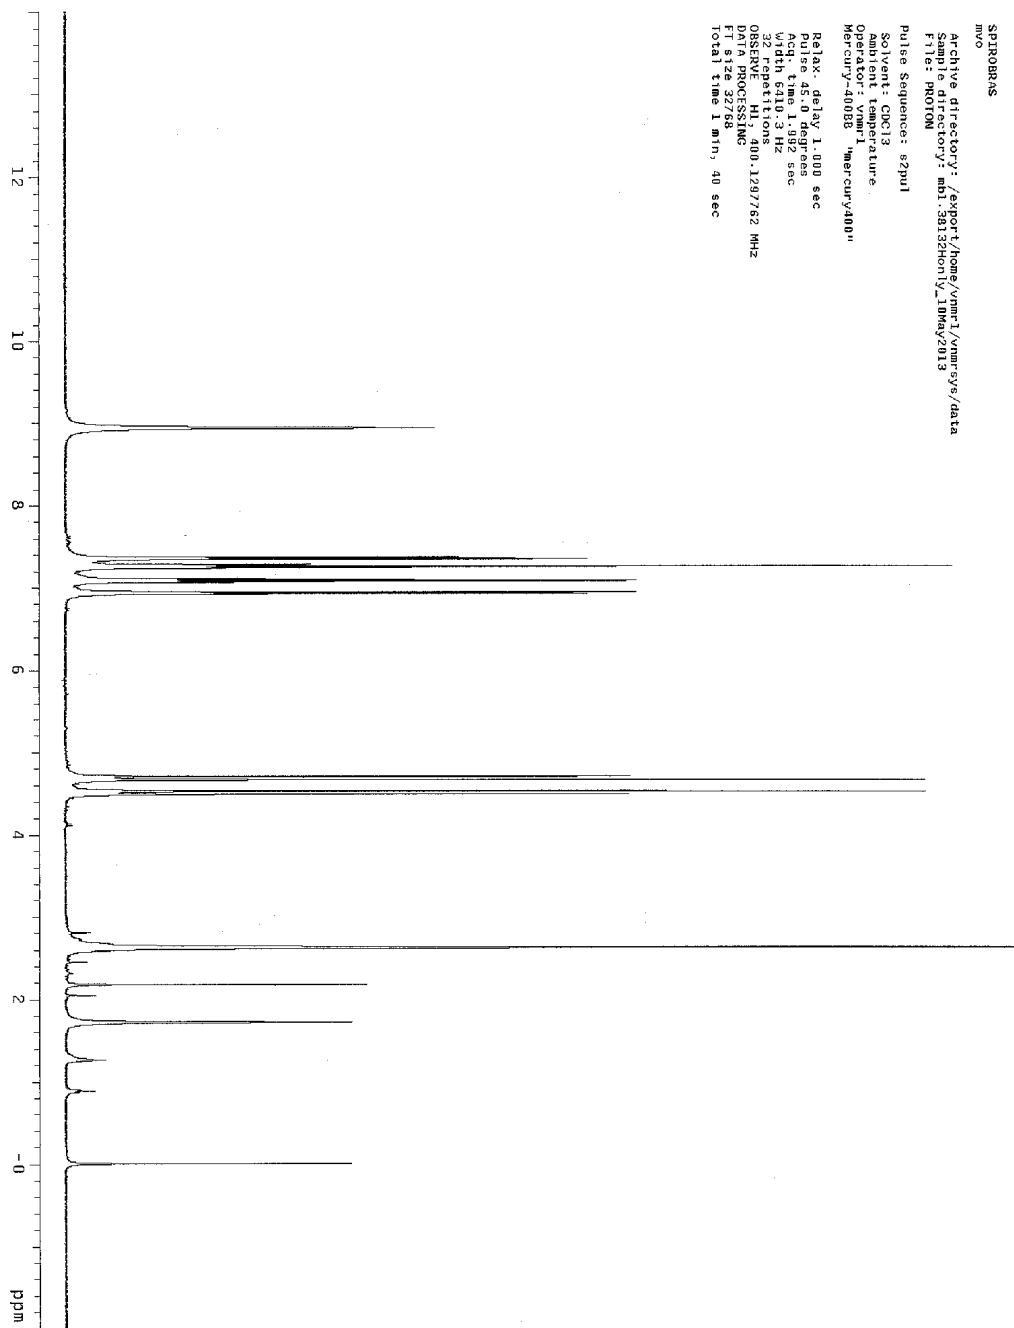

**(±)-1-Methylspirobrassinin [(±)-25]**  
<sup>1</sup>H NMR spectrum of (±)-25

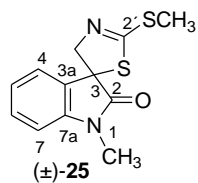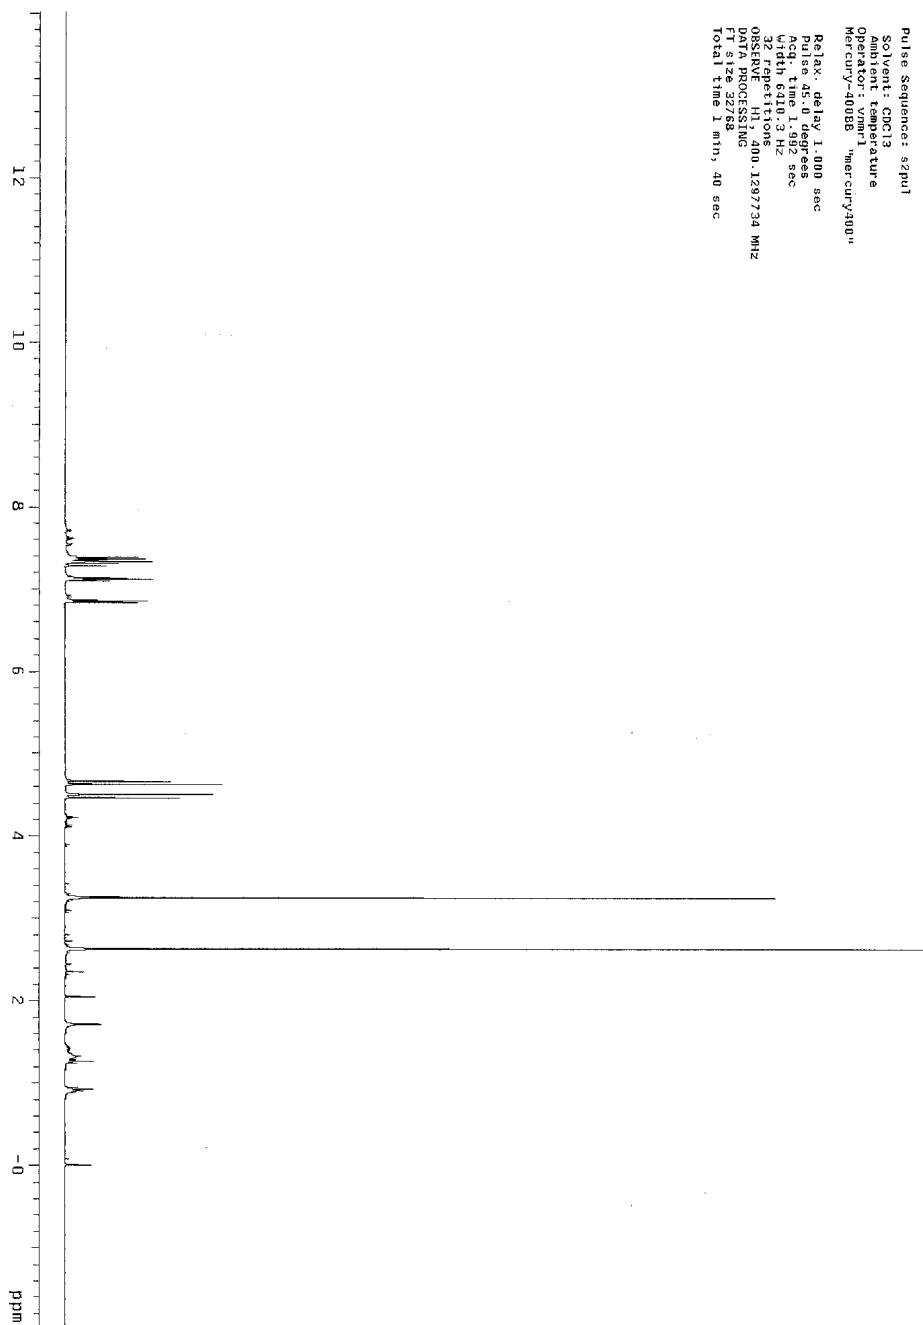

Supplement: c3ra46843g.pdf [file c3ra46843g.pdf]
